# Supplementary material for: Interactive network configuration maintains bacterioplankton community structure under elevated CO 2 in a eutrophic coastal mesocosm experiment
Source: Copernicus journal article supplement (doi:10.5194/bg-15-551-2018), 2018-01-29
Supplement: Supplementary file 1 [file bg-15-551-2018-supplement.zip]

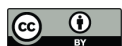

## *Supplement of*

# **Interactive network configuration maintains bacterioplankton community structure under elevated CO<sub>2</sub> in a eutrophic coastal mesocosm experiment**

**Xin Lin et al.**

*Correspondence to:* Xin Lin ([xinlinulm@xmu.edu.cn](mailto:xinlinulm@xmu.edu.cn)) and Kunshan Gao ([ksgao@xmu.edu.cn](mailto:ksgao@xmu.edu.cn))

- [bg-15-551-2018-supplement-title-page.pdf](#)
- Lin et al supplementary
  - Lin et al support figures 20171203.docx
  - supplementary table 2.xlsx
  - supplementary table 3.xlsx

The copyright of individual parts of the supplement might differ from the CC BY 3.0 License.
